# Supplementary material
Source: Royal Society of Chemistry journal article supplement (doi:10.1039/d6se00261g)
Supplement: d6se00261g1.pdf [file d6se00261g1.pdf]

Electronic Supporting Information (ESI) File

**Ultra-Small Pt on Ce–Mn Binary Oxide Nanocomposite as a Robust  
Oxygen Reduction Reaction Catalyst with Enhanced Methanol Crossover  
Tolerance**

Ammar Bin Yousaf<sup>a\*</sup>, Asad Ali<sup>b</sup>, Suryya Manzoor<sup>c</sup>, Bence Farkas<sup>d</sup>, Peter Kasak<sup>a\*</sup>

<sup>a</sup>Center for Advanced Materials, Qatar University, Doha 2713, Qatar

<sup>b</sup>School of Materials Science and Engineering, Hefei University of Technology, Hefei,  
230009, P.R. China

<sup>c</sup>Institute of Chemical Sciences, Bahauddin Zakaria University, Multan 60800, Pakistan

<sup>d</sup>Institute of Laboratory Research on Geomaterials, Faculty of Natural Sciences, Comenius  
University in Bratislava, Mlynska Dolina, Ilkovicova 6, 842 15 Bratislava, Slovakia.

\* Corresponding Authors E-mails: [ammar@mail.ustc.edu.cn](mailto:ammar@mail.ustc.edu.cn) /

[muhammad.ammar@qu.edu.qa](mailto:muhammad.ammar@qu.edu.qa) / [ammar.chemist18@gmail.com](mailto:ammar.chemist18@gmail.com) (A.B. Yousaf) and

[peter.kasak@qu.edu.qa](mailto:peter.kasak@qu.edu.qa) (P. Kasak)

**Table S1:** ICP-MS data for Pt loading in the studied Pt<sub>2</sub>/Ce-Mn-O, Pt<sub>4</sub>/Ce-Mn-O and Pt<sub>2</sub>/Ce-Mn-O electrocatalysts

| Catalyst                 | ICP-MS measurements    |             |                          |
|--------------------------|------------------------|-------------|--------------------------|
|                          | Pt<br>(mol)            | Pt<br>(wt%) | Pt<br>Nominal<br>Loading |
| Pt <sub>2</sub> /Ce-Mn-O | 2.247×10 <sup>-6</sup> | 1.94        | 2                        |

|                          |                        |      |   |
|--------------------------|------------------------|------|---|
| Pt <sub>4</sub> /Ce-Mn-O | 4.496×10 <sup>-6</sup> | 3.70 | 4 |
| Pt <sub>6</sub> /Ce-Mn-O | 6.743×10 <sup>-6</sup> | 5.69 | 6 |

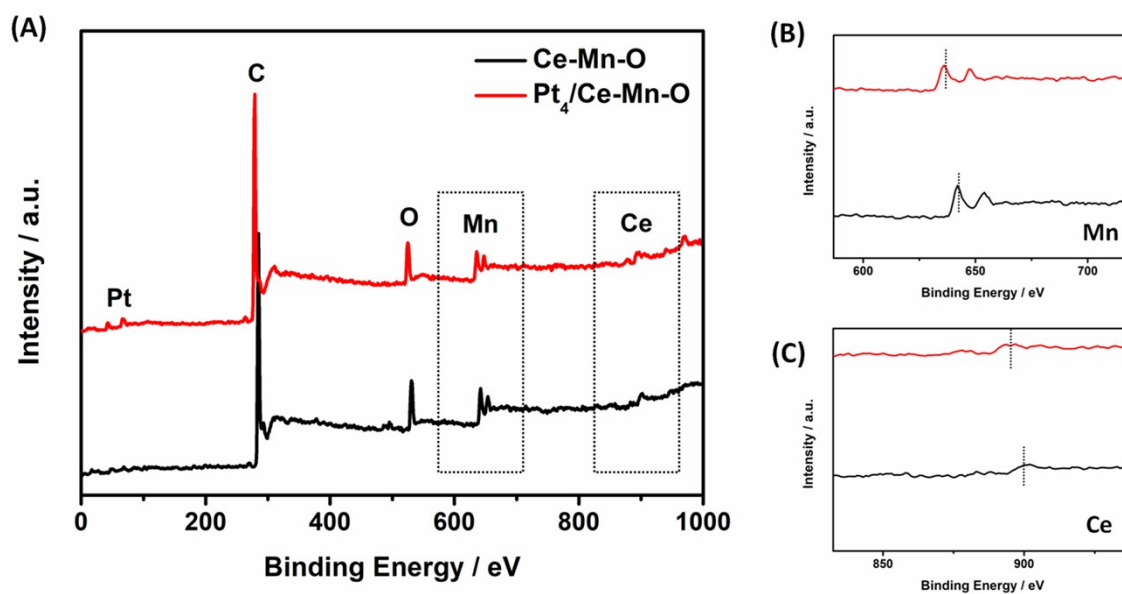

**Fig. S1:** (A) XPS survey spectrum for Ce-Mn-O and Pt<sub>4</sub>/Ce-Mn-O catalysts, (B) selected area high resolution for Mn scan and (C) selected area high resolution for Ce scan, both showing negative shift in peaks after Pt loading on Ce-Mn-O

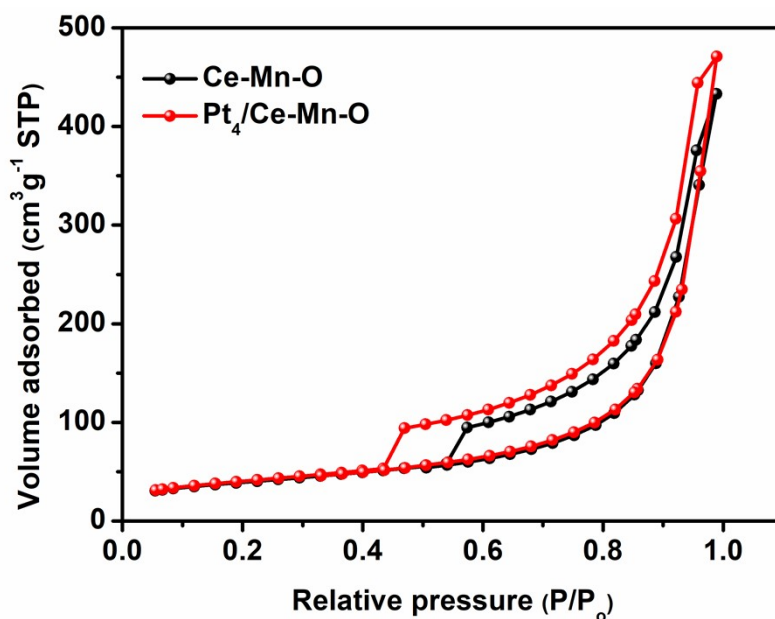

**Fig. S2:** Nitrogen adsorption-desorption isotherms of BET analysis for Ce-Mn-O and Pt<sub>4</sub>/Ce-Mn-O nanocomposites catalysts.

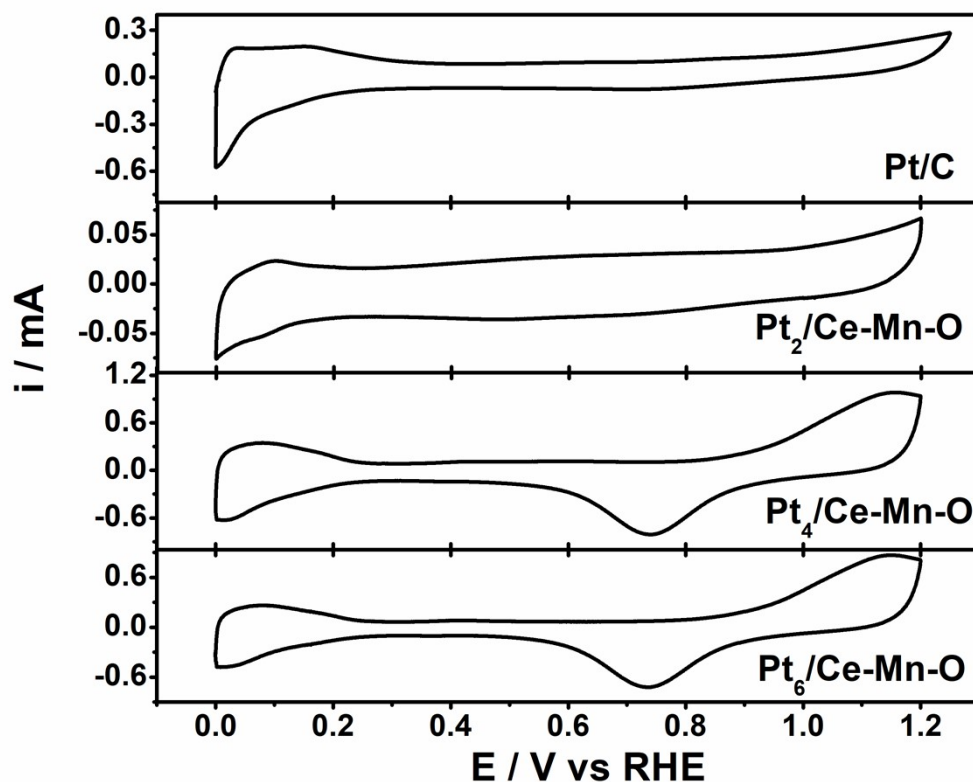

**Figure S3:** CVs for all the catalysts in 0.1 M KOH at scan rate of 50 mVs<sup>-1</sup>, for the measurement of electrochemical active surface area (ECSA)

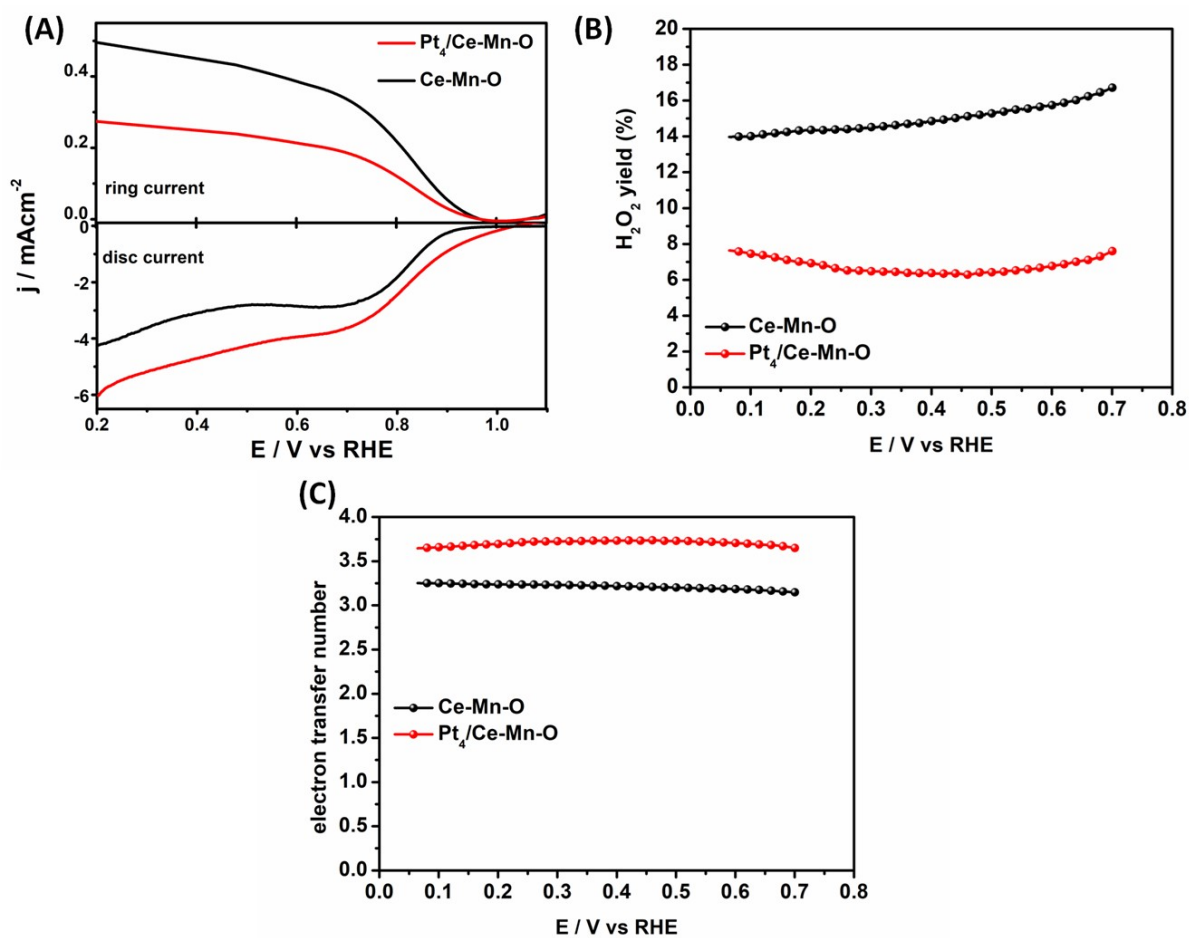

**Fig. S4:** (A) Rotating ring-disk electrode (RRDE) measurements for Ce-Mn-O and Pt<sub>4</sub>/Ce-Mn-O catalysts with mentioned ring current and disc current polarization curves, (B) H<sub>2</sub>O<sub>2</sub> percentage yield detected on a ring electrode and (C) calculated (*n* values) number of electron transfer from RRDE measurements

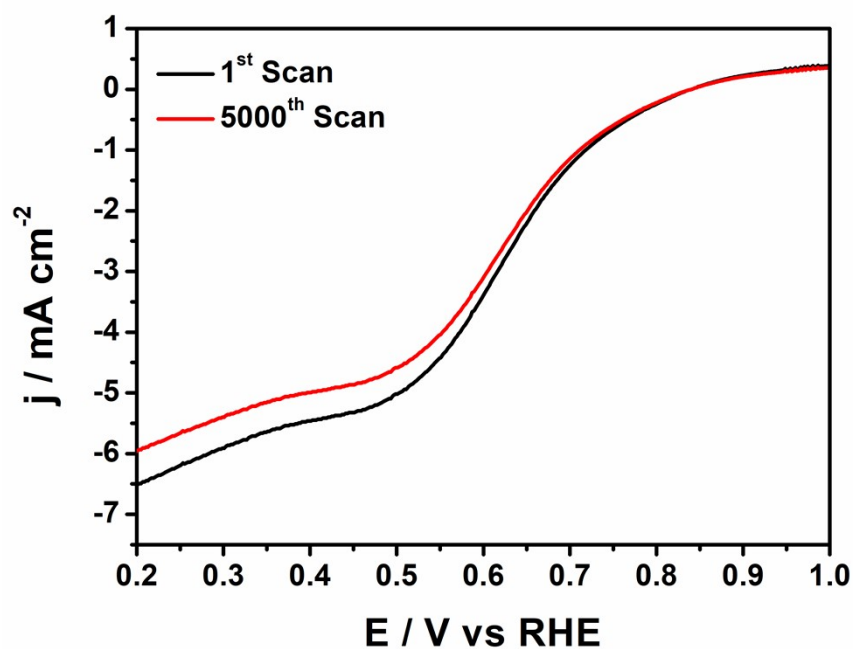

**Fig. S5:** Accelerated durability test (ADT) for ORR activity of Pt<sub>4</sub>/Ce-Mn-O catalyst in an acidic medium of 0.1M HClO<sub>4</sub> with ORR polarization curves at 1600 rpm rotation rate for 1<sup>st</sup> (black line) and 5000<sup>th</sup> cycle (red line).

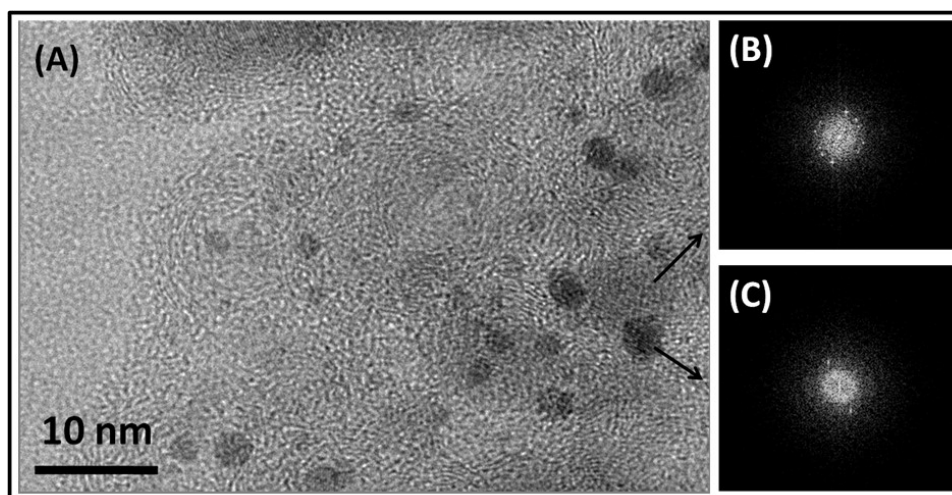

**Fig. S6:** Structural stability analysis with high resolution TEM micrograph image of Pt<sub>4</sub>/Ce-Mn-O catalyst layer after fuel cells testing, with FFT images corresponding to the (B) Ce-Mn-O binary oxide and (C) Pt particles from selected area represented with arrows.

**Table S2:** ORR performance (Tafel slope) comparison of Pt<sub>4</sub>/Ce-Mn-O catalyst with Pt and noble-metal based catalysts reported in literature in alkaline media

| Sr. No. | Catalyst                                          | Tafel Slope (mV dec <sup>-1</sup> ) | Reference |
|---------|---------------------------------------------------|-------------------------------------|-----------|
| 1       | Pt <sub>4</sub> /Ce-Mn-O                          | 55                                  | This work |
| 2       | Pt/N-C                                            | 70                                  | 53        |
| 3       | Pt/NrEGO <sub>2</sub> -CB3                        | 67                                  | 54        |
| 4       | Pt-NbO <sub>x</sub> /TiN                          | 62                                  | 55        |
| 5       | Pt <sub>37</sub> Cu <sub>56</sub> Au <sub>7</sub> | 65                                  | 56        |
| 6       | Thin Film Pt/GDL                                  | 60                                  | 57        |
| 7       | Pt <sub>2</sub> Fe <sub>1</sub> /C                | 63.51                               | 58        |
| 8       | Pt&Fe <sub>3</sub> N&Fe@NC                        | 74.16                               | 59        |
| 9       | 20 wt.-% Pt@XC-72                                 | 62                                  | 60        |
| 10      | 20 wt.-% Ir@XC-72                                 | 85                                  | 60        |
| 11      | PdMnO <sub>2</sub> .Pd/C                          | 60                                  | 61        |
| 12      | Ru-SAS/SNC                                        | 57                                  | 62        |
| 13      | Ag <sub>10</sub> /MnO <sub>2</sub> _MWCNT1        | 81                                  | 63        |

53. N. Batool, W. Iqbal, X. F. Han, W. T. Wang, H.-T. Teng, X. Hao, R. Yang and J. H. Tian, *ACS Appl. Nano Mater.*, 2021, **4**, 12365–12372.

54. Z. Jia, J. Chen, M. Pérez-Page, Z. Guo, Z. Zhao, R. Cai, M. T. P. Rigby, S. J. Haigh and S. M. Holmes, *J. Energy Chem.*, 2022, **68**, 143.

55. N. F. Daudt, A. Poozhikunnath, H. Yu, L. Bonville and R. Maric, *Mater. Renew. Sustain. Energy*, 2020, **9**, 18.

56. Y. Xie, Y. Yang, D. A. Muller, H. D. Abruna, N. Dimitrov and J. Fang, *ACS Catal.*, 2020, **10**, 9967–9976.
57. E. Marra, H. Grimler, G. Montserrat-Sisó, R. Wreland Lindström, B. Wickman, G. Lindbergh and C. Lagergren, *Electrochim. Acta*, 2022, **435**, 141376.
58. X. Leng, L. Huang, Y. Sun, X. Jin, F. Chen, H. Duan and B. Cao, *Fuel*, 2026, **408**, 137516.
59. X. Feng, H.-J. Zhang, H. Luo, Y. Tao, Z. Ma and Y. Xue, *Int. J. Hydrogen Energy*, 2025, **103**, 701–708.
60. M. F. Fink, J. Eckhardt, P. Khadke, T. Gerdes and C. Roth, *ChemElectroChem*, 2020, **7**, 4822–4836.
61. I. Cruz-Reyes, B. Trujillo-Navarrete, M. I. Salazar-Gastélum, J. R. Flores-Hernández, T. Romero-Castañón and R. M. Félix-Navarro, *Nanomaterials*, 2026, **16**, 71.
62. J. Qin, H. Liu, P. Zou, R. Zhang, C. Wang and H. L. Xin, *J. Am. Chem. Soc.*, 2022, **144**, 2197–2207.
63. J. M. Linge, H. Erikson, P. Ritslaid, A. Kikas, V. Kisand, J. Aruväli, J. Kozlova, A. Tamm, A. Sarapuu and K. Tammeveski, *Catalysts*, 2023, **13**, 976.
